# Supplementary material for: MnO2 nanosheet-based heparin and OSCS fluorescent biosensor with lowered background and amplified hybridization chain reaction
Source: Royal Society of Chemistry journal article supplement (doi:10.1039/c6ra15625h), 2016-01-01
Supplement: c6ra15625h1.pdf [file c6ra15625h1.pdf]

## **Supplemental Information**

### **MnO<sub>2</sub> nanosheets-based heparin and OSCS fluorescent biosensor with background lowered and hybridization chain reaction amplified**

Ruifen Tian<sup>a</sup>, Hong Jiang<sup>a</sup>, and Guangfeng Wang<sup>a,b\*</sup>

<sup>a</sup> College of Chemistry and Materials Science, Anhui Normal University; Key Laboratory of Chem-Biosensing, Anhui province; Key Laboratory of Functional Molecular Solids, Anhui province; Center for Nano Science and Technology, Wuhu 241000, PR China

<sup>b</sup> State Key Laboratory of Chemo/Biosensing and Chemometrics, Hunan University, Changsha 410082, PR China

## **Content**

**S1. Experimental part.**

**S2. Compared with other detection assay for Heparin.**

**S3. The reproducibility and stability for the detection of heparin.**

**S4. The practical analysis for the detection of heparin.**

**S5. Compared with other detection assay for OSCS.**

**S6. References.**

## S1. Experimental part

### Chemicals and Apparatus

HP<sub>1</sub>, HP<sub>2</sub> and helper DNA and DNA' were synthesized by Shanghai Sangon Biotechnology Co, Ltd. (Shanghai, China) and purified by HPLC. It was dissolved in Tris (hydroxymethyl) aminomethane (Tris)-HCl buffer (pH 7.0) as stock solution. Their sequences are listed in Table 1. Heparin sodium salt (heparin), coralyne chloride hydrate, sodium chloride (NaCl), calcium chloride (CaCl<sub>2</sub>), ascorbic acid (AA), chondroitin sulfate (ChS), hyaluronic acid (HA), Trypsin, albumin, globulin and fibronectin, SYBR Green I (10 000×), KMnO<sub>4</sub> and other reagents were purchased from Shanghai Sangon Biological Technology. Chondroitin sulfate A sodium salt from were purchased from Sigma Aldrich (St. Louis, MO). All the stocks and buffer solutions were prepared by using ultrapure water (PSDK2-10-C, Beijing, China).

Centrifugation was performed using a HERMLEZ 36 HK apparatus (Wehingen, Germany). All pH measurements were measured with a Model pHs-3c meter (Shanghai, China). Fluorescence spectra measurements of SG were obtained using a F-4600 fluorescence spectrophotometer (Hitachi, Japan) equipped with a xenon discharge lamp and 1 cm quartz cells. Both the excitation and emission slit width were set to 5.0 nm. All of the measurements were operated at room temperature of 298 K. Ultraviolet-visible absorption spectra were measured using UV-3010 spectrophotometer (Hitachi, Japan). Characterization of transmission electron microscopy (TEM) was carried out on Tecnai G220 ST (FEI) under the accelerating voltage of 200 kV. The sample for TEM measurement was prepared by the deposition of one drop of aqueous dispersion on a copper grid coated with thin films of carbon, and the solvent was removed by evaporation in air. All pH measurements were measured with a Model pHs-3c meter (Shanghai, China).

| Name            | sequences (from 5' to 3')                            |
|-----------------|------------------------------------------------------|
| HP <sub>1</sub> | TTTTTTTTTTCACGCAGAAACCTACACTCAAAAAAGTGTAGGTTTCTGCGTG |
| HP <sub>2</sub> | AGTGTAGGTTTCTGCGTGGGTTAACACGCAGAAACCTACACTTTTTTT     |
| helper DNA      | AAAAAAAAAAAAAGTGTAGGTTTCTGCGTGAAAAAAAAAAAA           |
| helper DNA'     | ATTAATTATATGTGTAGGTTTCTGCGTGATATTATTAA               |

### Preparation of MnO<sub>2</sub> nanosheet With Atomic Thickness.

MnO<sub>2</sub> nanosheets were synthesized by the Yoshida method (Kai et al., 2008). In brief, 20 mL of a solution containing 0.6 M tetramethylammonium (TMA) and 3% H<sub>2</sub>O<sub>2</sub> was added into 10 mL of 0.3 M MnCl<sub>2</sub> solution. The resulting suspension was vigorously stirred in air at room

temperature for 12 h, the precipitation was collected and sequentially washed with deionized water and absolute ethanol several times. The final product was dried in a vacuum oven at 60 °C overnight.

#### **Analytical procedure for heparin.**

Firstly, the helper DNA and helper DNA1 (HP<sub>1</sub> and HP<sub>2</sub>) solution was heated at 90 °C for 10 min and gradually cooled to room temperature at a constant rate over the course of 2 h to form the stem-loop structure respectively before use. Then, all the solutions were 600 µL and prepared by mixing substrate solution (100 nM helper DNA1, 10 nM helper DNA, 2 µM coralyne and 500 nM Hg<sup>2+</sup>) which consisted of 50 mM MgCl<sub>2</sub> and 5 mM Tris-HCl with the pH value equal to 7.0. In order to obtain the A<sub>10</sub>-MB-A<sub>10</sub>-coralyne probe (probe 1) and helper DNA1, all the samples were incubated at 24 °C for at least 10 min before the experiment. Successively, when the addition of heparin and 2 µM GSH, the solutions was carried out at 45 °C for 20 min and then SG (260 nM) and 100 µg/mL MNS were added with 10 min. Finally, the mixture were used for the determination of fluorescence.

#### **Analytical procedure for OSCS**

Firstly, we first prepare the different concentration of OSCS, standard heparin solutions (180 µg/mL) were mixed with a series of OSCS standards from 10<sup>-10</sup> % to 10 %. Then, the hairpin-like helper DNA and helper DNA1 (HP<sub>1</sub> and HP<sub>2</sub>) solution is prepared through the above method. Successively, all the solutions were 600 µL and prepared by mixing 100 nM helper DNA1, 10 nM helper DNA, 2 µM coralyne, 0.2 mM CaCl<sub>2</sub> and 500 nM Hg<sup>2+</sup> in 5 mM Tris-HCl with the pH value equal to 7.0. In order to obtain the A<sub>10</sub>-MB-A<sub>10</sub>-coralyne-Ca<sup>2+</sup> probe (probe 2), all the samples were incubated at 24 °C for at least 10 min before the experiment. Successively, when the addition of OSCS and 2 µM GSH, the solutions was carried out at 45 °C for 20 min and then SG (260 nM) and 100 µg/mL MNS were added with 10 min. Finally, the mixture were used for the determination of fluorescence. As a comparison, the solutions was carried out at 45 °C for 20 min with addition of heparin.

#### **Preparation of human serum samples**

Human serum samples were kindly provided by the Yi jishan Hospital (Wuhu, China). Human serum samples were centrifuged at 10,000 rpm for 15 min first. Subsequently, the supernatant was diluted with Tris-HCl appropriately before being analyze.

#### **Gel Electrophoresis**

Gel electrophoresis was used to confirm the formation of the CHR products. Samples for gel

electrophoresis assays were prepared as follows: (1) probe 1 was used as sample one; (2) probe 1 treated with heparin was used as sample two; (3) probe 2 treated with heparin was used as sample three; (4) probe 2 treated with OSCS was used as sample four. In the gel electrophoresis assay, each prepared sample (8  $\mu$ L) was put on 5% agarose gels to separate the related substances. The electrophoresis was carried in 0.5  $\times$ TBE buffer (pH 7.9) at 120 V constant voltage for 1 h. After EB staining, the gels were scanned using the Omega 16ic Gel imaging system (ULTRA-LUM, USA).

## S2. Compared with other detection assay for Heparin

**Table S1.** Comparison of different fluorescent sensors for the sensing of heparin.

| Method                  | Linear range( $\mu$ M) | LOD (S/N =3)         | Reference  |
|-------------------------|------------------------|----------------------|------------|
| Electrochemistry        | 0.5 - 10               | Not given            | S1         |
| UV-visible spectroscopy | Not given              | $8.3 \times 10^3$ nM | S2         |
| Colorimetry             | 0 - 55.8               | Not given            | S3         |
| Colorimetry             | 0.14 - 4.8             | 47 nM                | S4         |
| Fluorescence (QD)       | 0.05-15                | 12.46 nM             | S5         |
| Fluorescence (DNA)      | 0.01- 1                | 4 nM                 | S6         |
| Fluorescence (DNA)      | 0.01 - 4               | 3 nM                 | S7         |
| Fluorescence (DNA)      | $10^{-5}$ - 10         | 4 pM                 | This study |

## S3. The reproducibility and stability for the detection of heparin

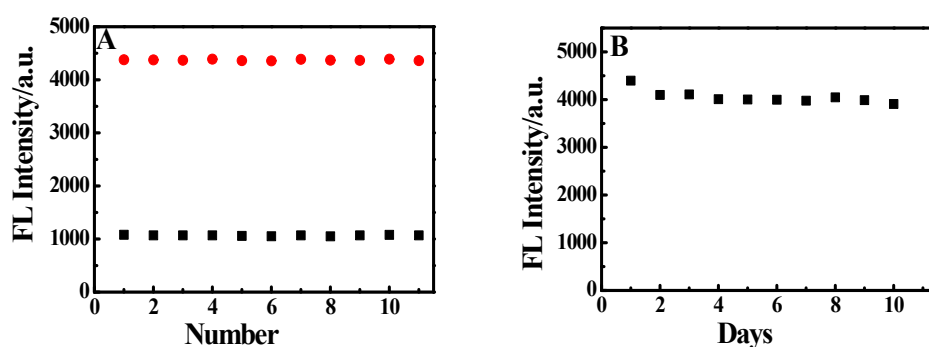

**Fig. S1.** (A) Fluorescence intensity of eleven independent tests for 200 pM (black) and 1  $\mu$ M (red) heparin used the proposed biosensor. (B) The time dependence of the signal change for 1  $\mu$ M heparin used the proposed biosensor.

#### S4. The practical analysis for the detection of heparin

**Table S2.** The results of real sample measurements

| Sample                        | Heparin added | found (n=3)  | Recovery (%) | R.S.D(%) |
|-------------------------------|---------------|--------------|--------------|----------|
| 1 % Diluted<br>human<br>Serum | 50 pM         | 51 pM        | 102          | 8.25     |
|                               | 500 nM        | 495 nM       | 99           | 7.97     |
|                               | 1 $\mu$ M     | 1.01 $\mu$ M | 101          | 8.12     |
|                               | 2 $\mu$ M     | 2.05 $\mu$ M | 103          | 8.54     |

#### S5. Compared with other detection assay for OSCS.

**Table S3.** Comparison of different method for the sensing of OSCS.

| Method                                    | LOD (S/N =3) (w/w) | Reference  |
|-------------------------------------------|--------------------|------------|
| strong anion exchange (SAX)-HPLC          | 0.03%              | S8         |
| NMR                                       | 0.1%               | S9         |
| capillary electrophoresis (CE)            | 0.1%               | S10        |
| polyacrylamide gel electrophoresis (PAGE) | 0.2%               | S11        |
| near-infrared (NIR)                       | 1%                 | S12        |
| HNMR                                      |                    | S13        |
| Taq polymerase inhibition                 | 0.16%              | S14        |
| Heparin enzyme immunoassay kit            | 0.1%               | S15        |
| Fluorescent assay                         | $10^{-10}$ %       | This study |

**Table S4.** Comparison of different material-based sensors for the sensing of OSCS.

| Method                                                | LOD (S/N =3) | Reference  | Time   | Enzyme treatment |
|-------------------------------------------------------|--------------|------------|--------|------------------|
| Potentiometric Polyanion Sensors                      | 0.5%         | S16        | 10min  | No               |
| Disposable striptype electrochemical polyanion sensor | 0.05%        | S17        | 120s   | No               |
| Watersoluble cationic polythiophene polymer           | 0.1%         | S18        | 30min  | Yes              |
| Polymer H sensor                                      | 0.5%         | S19        | 110min | Yes              |
| Gold Nanoparticle-based fluorescent sensor            | $10^{-9}\%$  | S20        | 30 min | Yes              |
| Molecular Beacon-Based Fluorescent Assay              | 0.01%        | S21        | 5 min  | No               |
| DNA-Based Fluorescent Assay                           | $10^{-10}\%$ | This study | 10 min | No               |

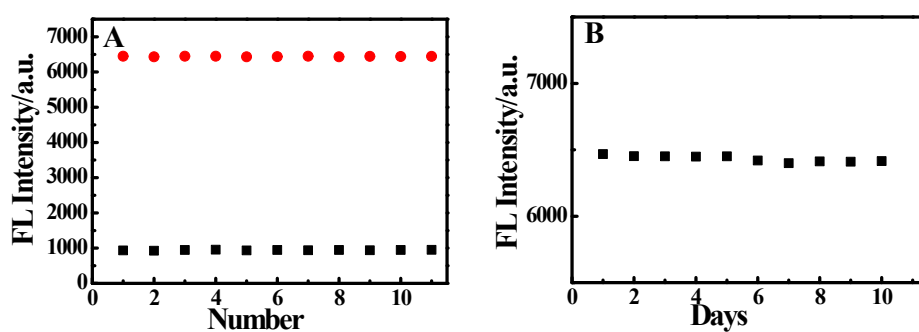

Fig S2. (A) Fluorescence intensity of eleven independent tests for ( $10^{-7}$ ,  $10^{-4}$ , and 10% w/w OSCS in heparin) used the proposed biosensor. (B) The time dependence of the signal change for 10% w/w OSCS used the proposed biosensor.

## S6. References

- S1 H. T. Qi, Z. Li, L. F. Yang, P. Yu, L. Q. Mao, *Anal. Chem.* 2013, **85**, 3439-3445.
- S2 S. M. Bromfield, A. Barnard, P. Posocco, M. Fermeglia, S. Pricl and D. K. Smith, *J. Am. Chem. Soc.* 2013, **135**, 2911-2914.
- S3 R. Y. Zhan, Z. Fang and B. Liu, *Anal. Chem.* 2010, **82**, 1326-1333.
- S4 R. Cao and B. X. Li, *Chem. Commun.* 2011, **47**, 2865-2867.
- S5 Z. P. Liu, Q. Ma, X. Y. Wang, Z. H. Lin, H. Zhang, L. L. Liu and X. G. Su, *Biosens. Bioelectron.* 2014, **54**, 617-622.
- S6 S. Y. Hung and W. L. Tseng, *Biosens. Bioelectron.* 2014, **57**, 186-191.
- S7 C. Y. Kuo and W. L. Tseng, *Chem. Commun.* 2013, **49**, 4607-4609.
- S8 M. L. Trehy, J. C. Reepmeyer, R. E. Kolinski, B. J. Westenberger and L. F. Buhse, *J. Pharm. Biomed. Anal.* 2009, **49**, 670-673.
- S9 I. McEwen, B. Mulloy, E. Hellwig, L. Kozerski, T. Beyer, U. Holzgrabe, R. Wanko, J. M. Spieser and A. Rodomonte, *Pharmeuropa Bio.* 2008, **2008**, 31-39.
- S10 N. Volpi, F. Maccari and R. J. Linhardt, *Anal. Biochem.* 2009, **388**, 140-45.
- S11 Z. Zhang, B. Li, J. Suwan, F. Zhang, Z. Wang, H. Liu, B. Mulloy and R. J. Linhardt, *J. Pharm. Sci.* 2009, **98**, 4017-4026.
- S12 J. A. Spencer, J. F. Kauman, J. C. Reepmeyer, C. M. Gryniewicz, W. Ye, D. Y. Toler, L. F. Buhse and B. J. Westenberger, *J. Pharm. Sci.* 2009, **98**, 3540-3547.
- S13 D. J. Langeslay, C. N. Beecher, A. Naggi, M. Guerrini, G. Torri and C. K. Larive, *Anal. Chem.* 2013, **85**, 1247-1255.
- S14 C. Tami, M. Puig, J. C. Reepmeyer, H. Ye, D. A. D'Avignon, L. Buhse and D. Verthelyi, *Biomaterials.* 2008, **29**, 4808-4814.
- S15 S. Bairstow, J. McKee, M. Nordhaus and R. Johnson, *Anal. Biochem.* 2009, **388**, 317321.
- S16 L. Wang, S. Buchanan and M. E. Meyerhoff, *Anal. Chem.* 2008, **80**, 9845-9847.
- S17 Y. Kang, K. Gwon, J. H. Shin, H. Nam, M. E. Meyerhoff and G. S. Cha, *Anal. Chem.* 2011, **83**, 3957-3962.
- S18 C. D. Sommers, D. J. Mans, L. C. Mecker and D. A. Keire, *Anal. Chem.* 2011, **83**, 3422-3430.
- S19 S. Lühn, S. Schiemann and S. Alban, *Anal. Bioanal. Chem.* 2011, **399**, 673-680.
- S20 C. Y. Lee and W. L. Tseng, *Anal. Chem.* 2015, **87**, 5031-5035.
- S21 M. Kalita, S. Balivada, V. P. Swarup, C. Mencio, K. Raman, U. R. Desai, D. Troyer and B. Kuberan, *J. Am. Chem. Soc.* 2013, **136**, 554-557.
